# Supplementary material for: A dual soft-template synthesis of hollow mesoporous silica spheres decorated with Pt nanoparticles as a CO oxidation catalyst
Source: Royal Society of Chemistry journal article supplement (doi:10.1039/c5ra17340j), 2015-01-01
Supplement: c5ra17340j1.pdf [file c5ra17340j1.pdf]

## Supporting Information

### Scheme S1

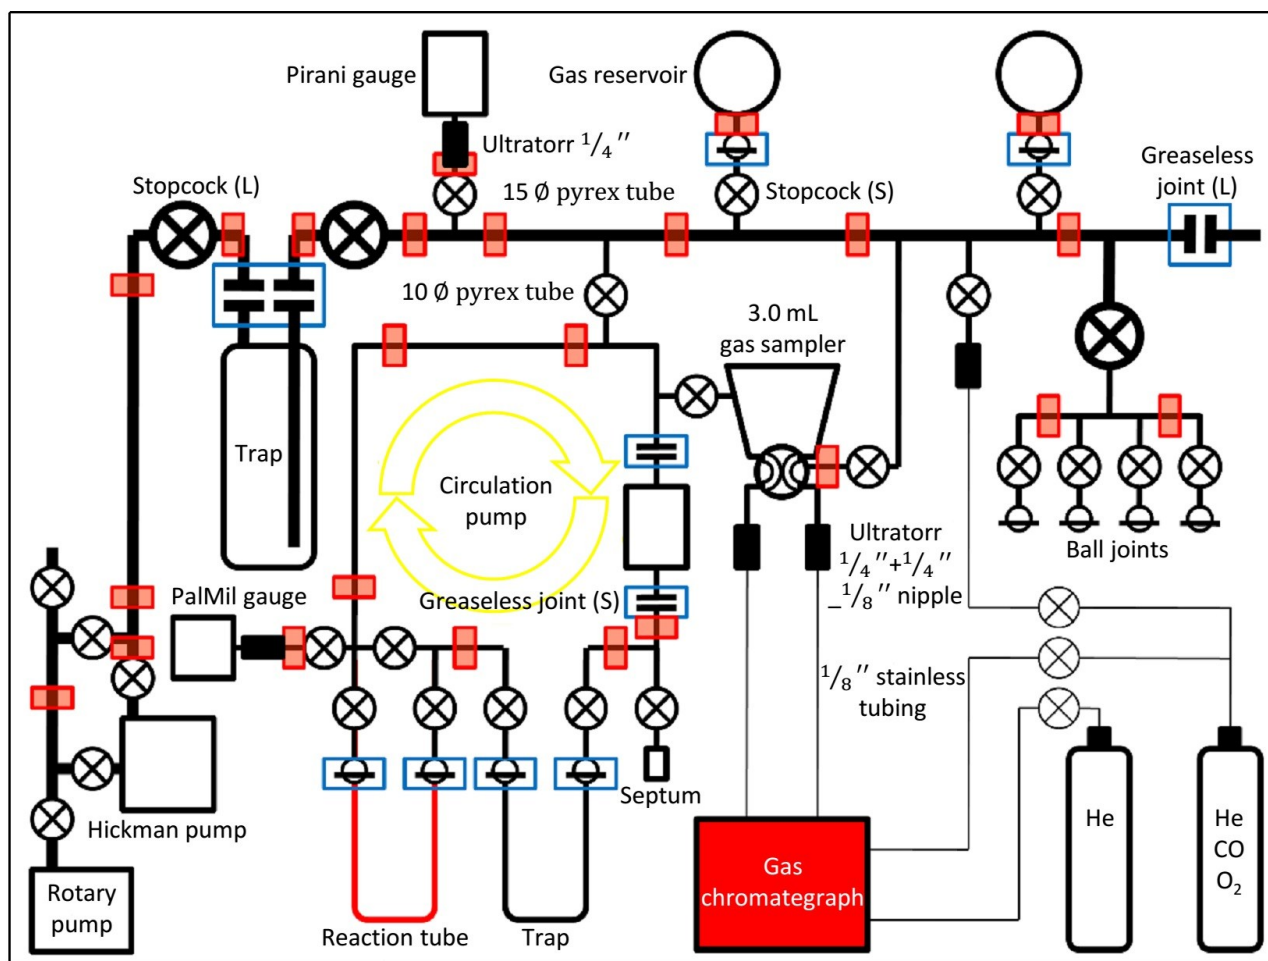

**Scheme S1.** An illustration of gas-circulation line for catalytic CO oxidation.

**Figure S1**

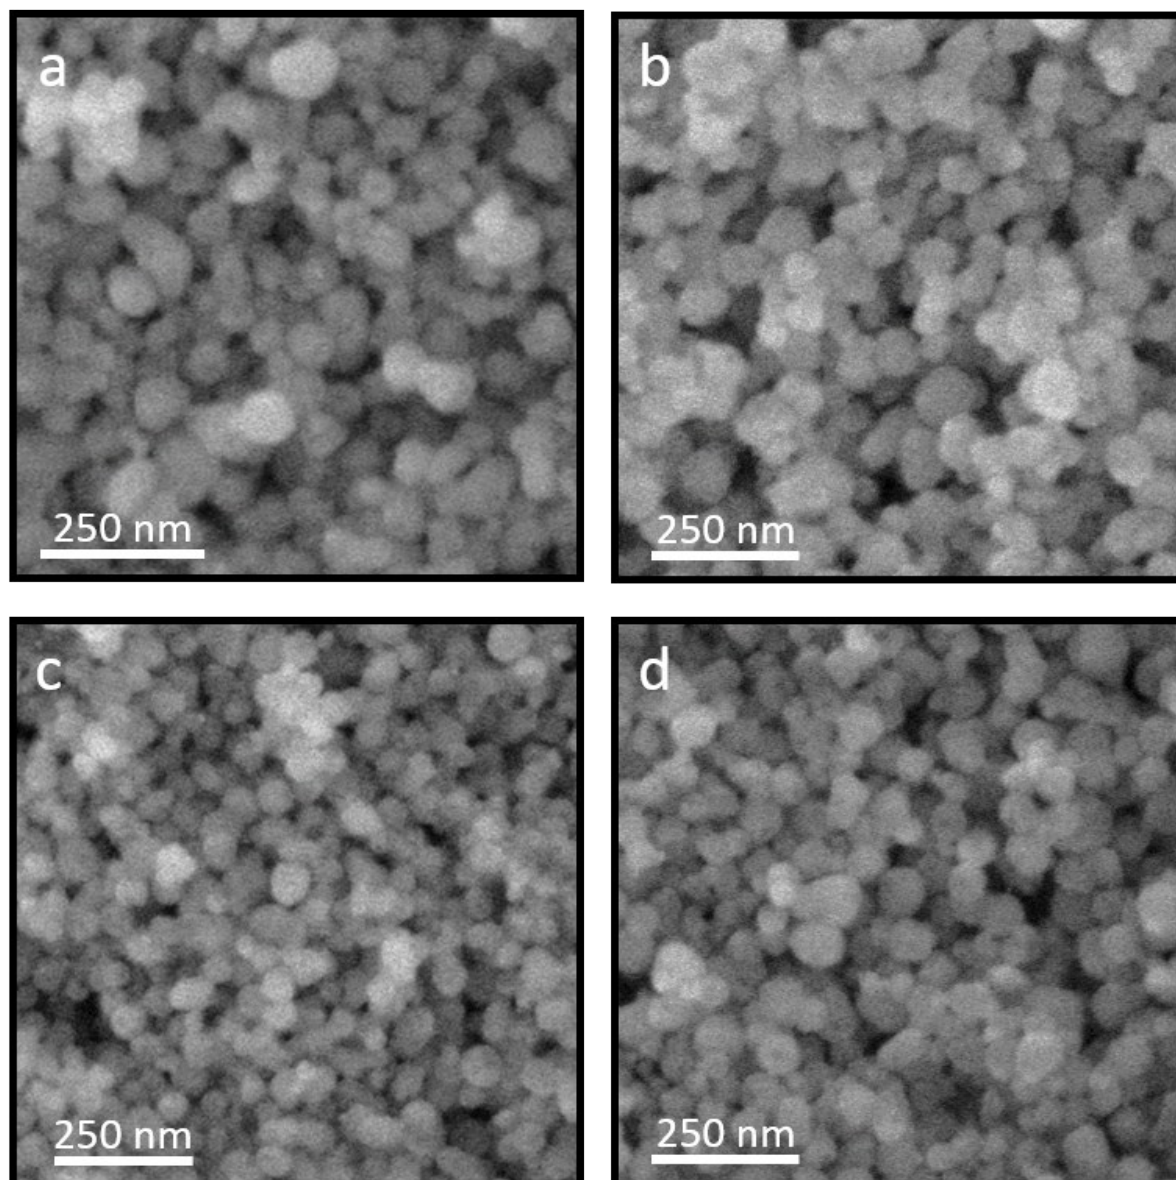

**Figure S1.** SEM images of (a) HMS/Pt\_5\_A, (b) HMS/Pt\_5\_N, (c) HMS/Pt\_10\_A, and (d) HMS/Pt\_10\_N.

**Figure S2**

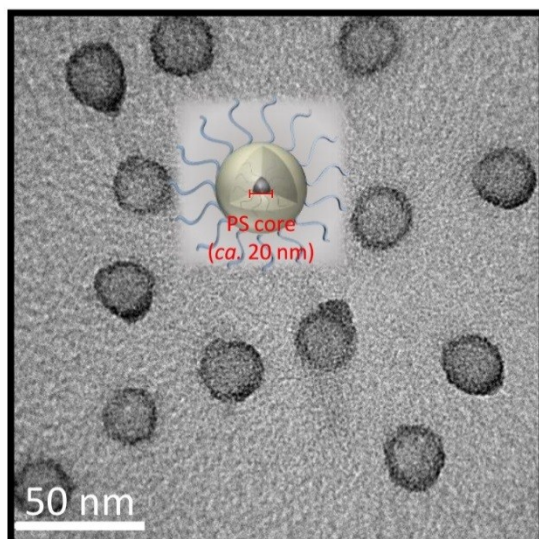

**Figure S2.** TEM image of PS-*b*-P2VP-*b*-PEO micelles. PS core is highlighted by 0.1 wt% phosphotungstic acid.

**Table S1.** Summary on surface areas, total pore volumes, average pore sizes, and Pt loading amounts for HMS, HMS/Pt\_5\_A, HMS/Pt\_5\_N, HMS/Pt\_10\_A, and HMS/Pt\_10\_N. Two examples of the related materials prepared with the same cationic surfactant are also shown for comparison.

| Sample name                                                         | Surface area (m <sup>2</sup> /g) | Total pore volume (cm <sup>3</sup> /g) | Pore size (nm) | ICP-Pt % |
|---------------------------------------------------------------------|----------------------------------|----------------------------------------|----------------|----------|
| HMS                                                                 | 1,160                            | -                                      | 2.50           | -        |
| HMS/Pt_5_A                                                          | 1,006                            | 1.92                                   | 2.30           | 1.4      |
| HMS/Pt_5_N                                                          | 1,043                            | 1.82                                   | 2.03           | 1.3      |
| HMS/Pt_10_A                                                         | 857                              | 1.57                                   | 2.30           | 2.6      |
| HMS/Pt_10_N                                                         | 788                              | 1.62                                   | 1.86           | 3.0      |
| <sup>a</sup> Au-nanocube@mSiO <sub>2</sub>                          | 303                              | -                                      | 2.6            |          |
| <sup>b</sup> Fe <sub>2</sub> O <sub>3</sub> @dual-mSiO <sub>2</sub> | 1154                             | 1.21                                   | 2.1            |          |

<sup>a</sup> *Chem. Mater.*, 2013, 25, 3030–3037; <sup>b</sup> *J. Am. Chem. Soc.*, 2010, 132, 15144–15147.

**Figure S3**

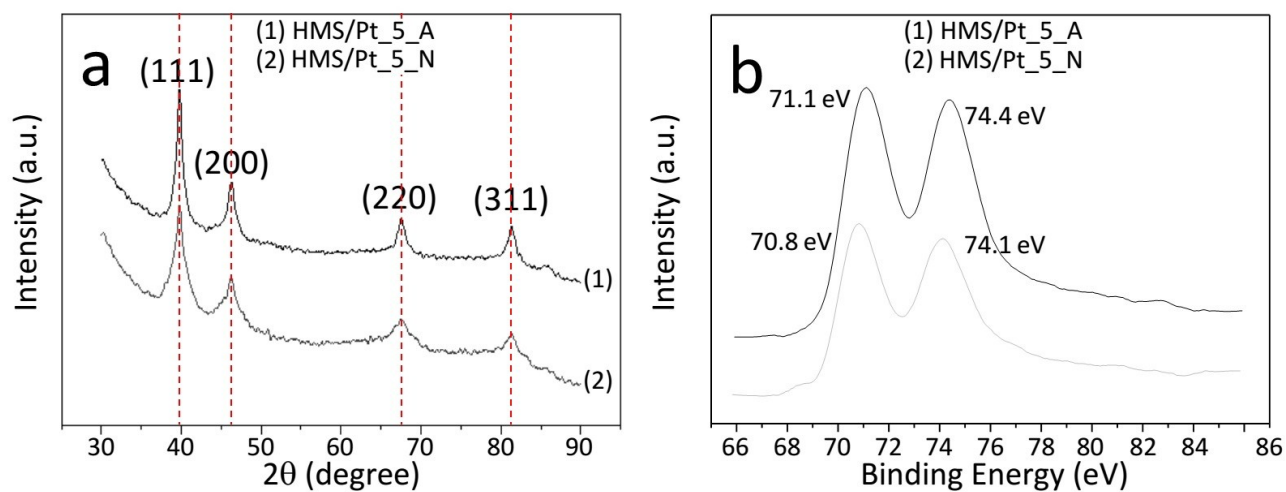

**Figure S3.** (a) Wide angle XRD profile and (b) XPS spectra of HMS/Pt\_5\_A and HMS/Pt\_5\_N.

**Table S2.** Literature values for the binding energy (eV) of Pt 4f<sub>7/2</sub>, Pt 4f<sub>5/2</sub>.

| Sample                               | Pt 4f <sub>7/2</sub> (eV) | Pt 4f <sub>5/2</sub> (eV) | Reference |
|--------------------------------------|---------------------------|---------------------------|-----------|
| Pure Pt                              | 71.2                      | 74.5                      | [S1]      |
| PtO                                  | 72.3                      | -                         | [S2]      |
| Pt-Pd Nanodendrites Pt <sup>0</sup>  | 71.4                      | 74.7                      | [S3]      |
| Pt-Pd Nanodendrites Pt <sup>II</sup> | 72.9                      | 77.3                      | [S3]      |
| Pt-Pd Alloy NPs Pt <sup>0</sup>      | 71.4                      | 74.8                      | [S4]      |
| Pt-Pd Alloy NPs Pt <sup>II</sup>     | 73.5                      | 76.6                      | [S4]      |

[S1] *Handbook of X-ray Photoelectron Spectroscopy*, Physical Electronics, Eden Prairie, 1995; [S2] *Surf. Sci.*, 2003, 545, 19-33; [S3] *J. Mater. Chem. A*, 2014, 2, 4384-4390; [S4] *Nanotechnology*, 2012, 23, 385602.

**Figure S4**

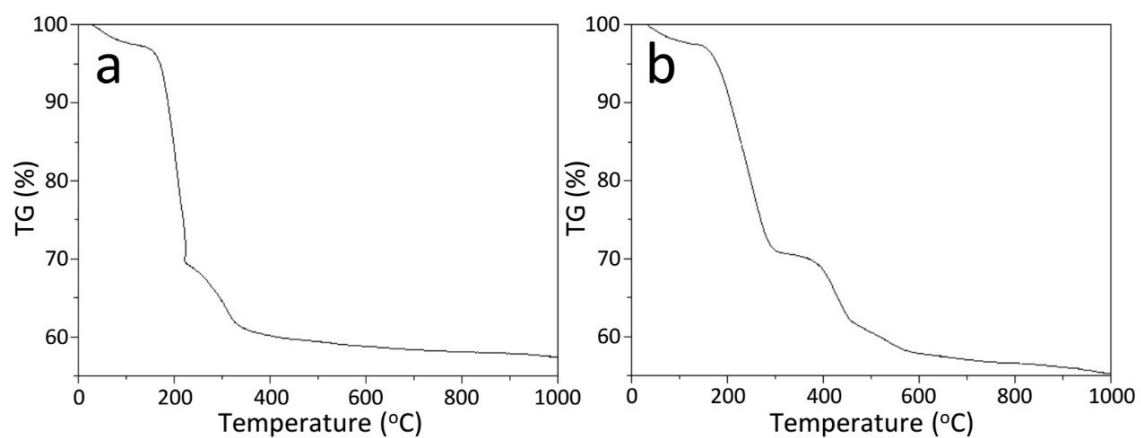

**Figure S4.** TG curves of as-prepared samples treated under (a) air and (b) nitrogen, respectively.
